# Supplementary material
Source: HighWire-hosted journal article supplement (https://thorax.bmj.com/content/76/11/1108)
Supplement: inline-supplementary-material-1 [file inline-supplementary-material-1.pdf]

# Supplementary file

## **Nasal versus Oronasal Masks for Home Non-Invasive Ventilation in patients with chronic hypercapnia.**

### ***A systematic review and individual participant data meta-analysis***

M. Lebet, A. Léotard, JL. Pépin, W. Windisch, E. Ekkernkamp, M. Pallero, MÁ. Sánchez-Quiroga, N. Hart, J. Kelly, M. Patout, GC. Funk, ML. Duiverman, JF. Masa, A. Simonds, P. B. Murphy, PJ. Wijkstra, M. Dreher, J. Storre, C. Khouri and JC. Borel

## Table of contents

|                                                                                       |    |
|---------------------------------------------------------------------------------------|----|
| Search equation for Medline: .....                                                    | 2  |
| Search equation for CENTRAL: .....                                                    | 2  |
| Detailed risk of bias analysis.....                                                   | 3  |
| Baseline characteristics of the IPD in each study included in the meta-analysis ..... | 4  |
| Grading of Recommendations, Assessment, Development and Evaluations (GRADE).....      | 5  |
| Summary of mixed model results.....                                                   | 6  |
| Interaction between type of mask and the underlying pathology .....                   | 7  |
| Sensitivity analysis according to risk of bias .....                                  | 8  |
| Interaction between type of mask and the duration of follow-up.....                   | 9  |
| Two step meta-analysis for EPAP and IPAP .....                                        | 10 |
| Interaction between mask-type and underlying pathology using marginal means.....      | 11 |
| Non-inferiority analysis.....                                                         | 14 |
| Trial sequential analysis .....                                                       | 17 |
| References.....                                                                       | 18 |

## Search equation for Medline:

*("Noninvasive Ventilation"[Mesh] OR NIV OR nppv OR nipp OR nippv OR noninvasive positive pressure ventilation) AND ("Respiratory Insufficiency"[Mesh] OR "Pulmonary Disease, Chronic Obstructive"[Mesh] OR "Respiratory failure" OR "Obesity Hypoventilation Syndrome"[Mesh] OR copd OR OHS) AND ("Randomized Controlled Trial"[Publication Type] OR randomised trial OR randomized trial OR controlled trial)*

*Publication dates: from 1994/01/01*

## Search equation for CENTRAL:

- #1 MeSH descriptor: [Noninvasive Ventilation] explode all trees
- #2 NIV
- #3 NPPV
- #4 NiPPV
- #5 NiPP
- #6 noninvasive positive pressure ventilation
- #7 MeSH descriptor: [Respiratory Insufficiency] explode all trees
- #8 MeSH descriptor: [Pulmonary Disease, Chronic Obstructive] explode all trees
- #9 MeSH descriptor: [Obesity Hypoventilation Syndrome] explode all trees
- #10 Respiratory failure
- #11 COPD
- #12 OHS
- #13 MeSH descriptor: [Randomized Controlled Trial] explode all trees
- #14 Randomised trial
- #15 Randomized trial
- #16 Controlled trial
- #17 (#1 OR #2 OR #3 OR #4 OR #5 OR #6) AND (#7 OR #8 #9 OR #10 OR #11 OR #12) AND (#13 OR #14 OR #15 OR #16)

Detailed risk of bias analysis

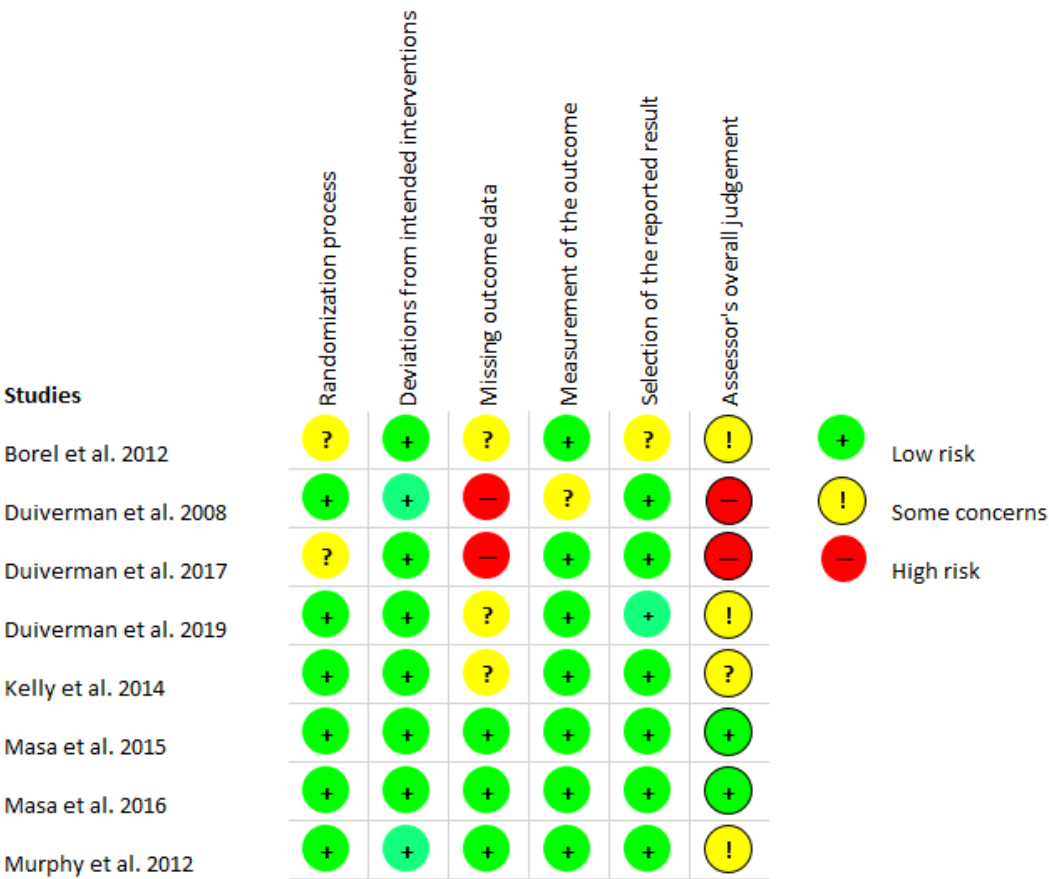

e-figure 1. Detailed risk of bias analysis using the revised tool for assessing risk of bias in randomized trials.

## Baseline characteristics of the IPD in each study included in the meta-analysis

| e-table 1. Baseline characteristics of the IPD in each study included in the meta-analysis |                             |                       |                      |                                 |                       |                      |                           |                          |
|--------------------------------------------------------------------------------------------|-----------------------------|-----------------------|----------------------|---------------------------------|-----------------------|----------------------|---------------------------|--------------------------|
| Study                                                                                      | Type of mask used,<br>No(%) | Female,<br>No(%)      | Age, mean<br>(SD), y | BMI <sup>a</sup> , mean<br>(SD) | FEV1, mean<br>(SD), L | FVC, mean<br>(SD), L | PaCO2, mean<br>(SD), mmHg | PaO2, mean<br>(SD), mmHg |
| Borel et al. (2012)                                                                        | Nasal, 4(31)                | 9 (53)                | 57.3 (10.7)          | 39.7 (6.44)                     | 2.23 (0.72)           | 2.82 (0.96)          | 47.9 (4.21)               | 73.8 (8.97)              |
|                                                                                            | Oronasal, 9(69)             |                       |                      |                                 |                       |                      |                           |                          |
| Diuverman et al.<br>(2019)                                                                 | Nasal, 4(7)                 | 40 (60)               | 63.3 (7.80)          | 25.3 (5.09)                     | 0.59 (0.19)           | 2.05 (0.62)          | 55.4 (7.56)               | 52.7 (11.6)              |
|                                                                                            | Oronasal, 57(93)            |                       |                      |                                 |                       |                      |                           |                          |
| Kelly et al. (2014)                                                                        | Nasal, 2(18)                | 5 (45)                | 50.7 (13.1)          | 45.4 (14.6)                     | 1.52 (0.84)           | 2.24 (0.93)          | 50.4 (5.31)               | 62.7 (11.0)              |
|                                                                                            | Oronasal, 9(82)             |                       |                      |                                 |                       |                      |                           |                          |
| Diuverman et al.<br>(2017)                                                                 | Nasal, 4(29)                | 9 (64)                | 68.4 (8.42)          | 25.4 (5.75)                     | 0.76 (0.37)           | 2.97 (0.92)          | 53.5 (8.02)               | 64.8 (9.57)              |
|                                                                                            | Oronasal, 10(71)            |                       |                      |                                 |                       |                      |                           |                          |
| Diuverman et al.<br>(2008)                                                                 | Nasal, 11(35)               | 13 (41)               | 63.3 (9.85)          | 27.1 (6.41)                     | 0.83 (0.37)           | 2.74 (0.82)          | 51.0 (4.79)               | 59.2 (8.42)              |
|                                                                                            | Oronasal, 20(65)            |                       |                      |                                 |                       |                      |                           |                          |
| Masa et al. (2015)                                                                         | Nasal, 5(7)                 | 46 (65)               | 63.8 (10.5)          | 43.1 (6.63)                     | 2.30 (0.76)           | 2.83 (0.94)          | 50.9 (4.32)               | 61.6 (8.71)              |
|                                                                                            | Oronasal, 66(93)            |                       |                      |                                 |                       |                      |                           |                          |
| Masa et al. (2016)                                                                         | Nasal, 7(19)                | 27 (75)               | 64.8 (10.4)          | 41.0 (5.45)                     | 2.14 (0.70)           | 2.66 (0.89)          | 50.6 (4.26)               | 64.4 (10.5)              |
|                                                                                            | Oronasal, 32(82)            |                       |                      |                                 |                       |                      |                           |                          |
| Murphy et al.<br>(2012)                                                                    | Nasal, 4(8)                 | 23 (46)               | 54.8 (10.6)          | 50.8 (7.98)                     | 1.70 (0.71)           | 2.13 (0.85)          | 51.8 (5.49)               | 65.8 (11.4)              |
|                                                                                            | Oronasal, 46(92)            |                       |                      |                                 |                       |                      |                           |                          |
| Overall                                                                                    | Nasal, 41(14)               | 164 (57) <sup>b</sup> | 61.8 (10.7)          | 27.1 (8.9)                      | 1.6 (0.9)             | 2.2 (8)              | 50.9 (6.4)                | 61.2 (11.7)              |
|                                                                                            | Oronasal, 249(86)           |                       |                      |                                 |                       |                      |                           |                          |

*a* - Calculated as weight in kilograms divided by height in meters squared.

*b* - 3 patients had missing data

PaCO2: Partial pressure of carbon dioxide; PaO2: Partial pressure of oxygen; FVC: Forced Vital Capacity; FEV1: Forced Expiratory Volume in the first second; BMI: Body Mass Index; SD: Standard Deviation

## Grading of Recommendations, Assessment, Development and Evaluations (GRADE)

We GRADEd each interaction estimates according to the following criteria.

- (1) *Study limitations: we estimated the risk of bias as low, moderate, or high for each study using the Cochrane RoB2. We rated the body of evidence at the outcome level according to the risk of bias.*
- (2) *Inconsistency: we downgraded for inconsistency if substantial heterogeneity ( $P > 50\%$ ) or if CI of effect size did not overlap.*
- (3) *Indirectness: we downgraded for indirectness if trial characteristics (duration of follow-up, design) or etiology/population differed significantly.*
- (4) *Imprecision: we downgraded for imprecision if CI of the overall results were superior to minimal differences (non-inferiority margins), that we defined for each outcome and if the optimal information size was not reached.*
- (5) *Publication bias: we systematically downgraded for publication bias given that we did not get access to all selected data in this individual patient meta-analysis*

|                   | Number of studies | Number of patients | Heterogeneity | Risk of bias                             | Inconsistency                             | Indirectness                         | Imprecision                                 | Publication bias                   | Overall quality of evidence |
|-------------------|-------------------|--------------------|---------------|------------------------------------------|-------------------------------------------|--------------------------------------|---------------------------------------------|------------------------------------|-----------------------------|
| <b>PaCO2</b>      | 8                 | 266                | 50%           | No serious risk of bias (High certainty) | No serious inconsistency (High certainty) | Serious indirectness (Low certainty) | Serious imprecision IOS=544 (Low certainty) | Strongly suspected (Low certainty) | VERY LOW<br>○○○⊗            |
| <b>PaO2</b>       | 7                 | 255                | 71%           | No serious risk of bias (High certainty) | No serious inconsistency (Low certainty)  | Serious indirectness (Low certainty) | Serious imprecision IOS=544 (Low certainty) | Strongly suspected (Low certainty) | VERY LOW<br>○○○⊗            |
| <b>Compliance</b> | 8                 | 262                | 4%            | No serious risk of bias (High certainty) | No serious inconsistency (High certainty) | Serious indirectness (Low certainty) | Serious imprecision IOS=544 (Low certainty) | Strongly suspected (Low certainty) | VERY LOW<br>○○○⊗            |
| <b>EPAP</b>       | 8                 | 269                | 0%            | No serious risk of bias (High certainty) | No serious inconsistency (High certainty) | Serious indirectness (Low certainty) | Serious imprecision IOS=544 (Low certainty) | Strongly suspected (Low certainty) | VERY LOW<br>○○○⊗            |
| <b>IPAP</b>       | 8                 | 238                | 24%           | No serious risk of bias (High certainty) | No serious inconsistency (High certainty) | Serious indirectness (Low certainty) | Serious imprecision IOS=544 (Low certainty) | Strongly suspected (Low certainty) | VERY LOW<br>○○○⊗            |

e-table 2 GRADE assessment of overall and subgroup analysis. *Optimal Information Size (OIS)*; EPAP: Expiratory Positive Airway Pressure; IPAP: Inspiratory Positive Airway Pressure; PaCO2: partial pressure of CO2; PaO2: partial pressure of O2.

## Summary of mixed model results

| Outcome                 | Model          | N (subjects, studies) | Mean difference<br>oronasal minus<br>nasal (95% CI) | p-value     |
|-------------------------|----------------|-----------------------|-----------------------------------------------------|-------------|
| <b>PaCO<sub>2</sub></b> | Crude model    | 266· 8                | 1·34 (-2·07· 4·76)                                  | 0·46        |
|                         | Adjusted model | 252· 8                | 0·61 (-2·15· 3·38)                                  | 0·68        |
| <b>PaO<sub>2</sub></b>  | Crude model    | 255· 7                | -0·89 (-5·28· 3·50)                                 | 0·70        |
|                         | Adjusted model | 242· 7                | -0·00 (-4·59· 4·58)                                 | 1·00        |
| <b>Compliance</b>       | Crude model    | 262· 8                | 0·39 (-0·59· 1·37)                                  | 0·44        |
|                         | Adjusted model | 257· 8                | 0·29 (-0·74· 1·32)                                  | 0·58        |
| <b>EPAP</b>             | Crude model    | 269· 8                | 0·02 (-0·67· 0·71)                                  | 0·95        |
|                         | Adjusted model | 220· 7                | -0·36 (-1·08· 0·36)                                 | 0·33        |
| <b>IPAP</b>             | Crude model    | 238· 8                | 1·87 (0·44· 3·30)                                   | <b>0·01</b> |
|                         | Adjusted model | 220· 7                | 1·42 (-0·04· 2·88)                                  | 0·06        |

e-table 3. Summary of mixed model results. *EPAP: Expiratory Positive Airway Pressure; IPAP: Inspiratory Positive Airway Pressure; PaCO<sub>2</sub>: partial pressure of CO<sub>2</sub>; PaO<sub>2</sub>: partial pressure of O<sub>2</sub>.*

## Interaction between type of mask and the underlying pathology

| Outcome                 | Model                      | Population       | N (subjects-studies) | Mean difference oronasal minus nasal (95% CI) | p-value |
|-------------------------|----------------------------|------------------|----------------------|-----------------------------------------------|---------|
| <b>PaCO<sub>2</sub></b> | Interaction mask*pathology | Whole population | 252- 8               | -5.19 (-9.65, -0.72)                          | 0.06    |
|                         |                            | OHS              | 167- 5               | -1.03 (-4.36, 2.29)                           | 0.56    |
|                         |                            | COPD             | 85- 4                | 3.29 (0.22, 6.35)                             | 0.08    |
| <b>PaO<sub>2</sub></b>  | Interaction mask*pathology | Whole population | 242- 7               | 7.32 (-0.52, 15.15)                           | 0.12    |
|                         |                            | OHS              | 159- 4               | 2.97 (-2.92, 8.87)                            | 0.39    |
|                         |                            | COPD             | 83- 3                | -4.36 (-10.26, 1.54)                          | 0.23    |
| <b>Compliance</b>       | Interaction mask*pathology | Whole population | 257- 8               | 0.93 (-1.47, 3.34)                            | 0.48    |
|                         |                            | OHS              | 172- 5               | 0.67 (-0.69, 2.03)                            | 0.34    |
|                         |                            | COPD             | 85- 4                | -0.50 (-2.05, 1.05)                           | 0.61    |
| <b>EPAP</b>             | Interaction mask*pathology | Whole population | 220- 7               | -0.22 (-1.64, 1.20)                           | 0.76    |
|                         |                            | OHS              | 137- 4               | -0.46 (-1.57, 0.65)                           | 0.42    |
|                         |                            | COPD             | 83- 3                | -0.25 (-1.07, 0.56)                           | 0.54    |
| <b>IPAP</b>             | Interaction mask*pathology | Whole population | 220- 7               | -1.15 (-4.02, 1.72)                           | 0.43    |
|                         |                            | OHS              | 137- 4               | 0.67 (-1.26, 2.59)                            | 0.50    |
|                         |                            | COPD             | 83- 3                | 2.31 (-0.01, 4.63)                            | 0.06    |

e-table 4. Interaction between type of mask and the underlying pathology and marginal means in mixed effect models according to the underlying pathology and the type of mask. *EPAP*: Expiratory Positive Airway Pressure; *IPAP*: Inspiratory Positive Airway Pressure; *PaCO<sub>2</sub>*: partial pressure of CO<sub>2</sub>; *PaO<sub>2</sub>*: partial pressure of O<sub>2</sub>



## Sensitivity analysis according to risk of bias

| <i>Outcome</i>    | <i>N (subjects-studies)</i> | <i>Mean difference oronasal minus nasal (95% CI)</i> | <i>p-value</i> |
|-------------------|-----------------------------|------------------------------------------------------|----------------|
| <i>PaCO2</i>      | 216- 6                      | 0.49 (-3.71, 4.71)                                   | 0.82           |
| <i>PaO2</i>       | 206- 5                      | 1.26 (-4.54, 7.07)                                   | 0.69           |
| <i>Compliance</i> | 221- 6                      | 0.63 (-0.67, 1.94)                                   | 0.34           |
| <i>EPAP</i>       | 188- 6                      | -0.47 (-1.39, 0.44)                                  | 0.31           |
| <i>IPAP</i>       | 188- 6                      | 1.16 (-0.49, 2.82)                                   | 0.17           |

e-table 5 sensitivity analysis including moderate to low risk of bias trials

## Interaction between type of mask and the duration of follow-up

| <i>Outcome</i>    | <i>Model</i>                            | <i>N (subjects-studies)</i> | <i>Mean difference oronasal minus nasal (95% CI)</i> | <i>p-value</i> |
|-------------------|-----------------------------------------|-----------------------------|------------------------------------------------------|----------------|
| <i>PaCO2</i>      | Interaction mask* duration of follow-up | 252- 8                      | 10.81 (-6.68, 28.31)                                 | 0.25           |
| <i>PaO2</i>       | Interaction mask* duration of follow-up | 242- 7                      | -21.02 (-50.13, 8.10)                                | 0.20           |
| <i>Compliance</i> | Interaction mask* duration of follow-up | 257- 8                      | -4.07 (-11.76, 3.61)                                 | 0.32           |
| <i>PEP</i>        | Interaction mask* duration of follow-up | 220- 7                      | -0.28 (-5.14, 4.58)                                  | 0.91           |
| <i>PIP</i>        | Interaction mask* duration of follow-up | 220- 7                      | 2.47 (-7.24, 12.19)                                  | 0.62           |

e-table 6. Interaction between type of mask and the duration of follow-up. *EPAP*: Expiratory Positive Airway Pressure; *IPAP*: Inspiratory Positive Airway Pressure; *PaCO2*: partial pressure of CO<sub>2</sub>; *PaO2*: partial pressure of O<sub>2</sub>.

## Two step meta-analysis for EPAP and IPAP

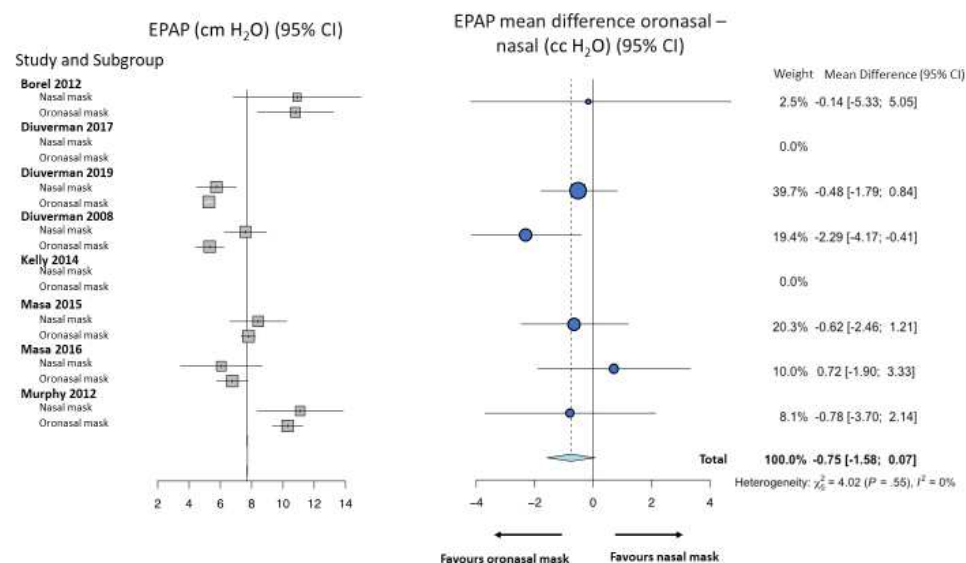

e-figure 2: Summary results of the two step meta-analysis using fixed effect model for Expiratory Positive Airway Pressure (EPAP). The results for each type of mask in each study are displayed on the left forest plot and the interaction between mask-type and the effect on the outcomes at the end of the studies are displayed on the right forest plot. Results are presented using mean differences and 95% CI. Squares are used to depict effects and circles to depict the interaction effects, with sizing in proportion to the inverse of the variance of the estimates.

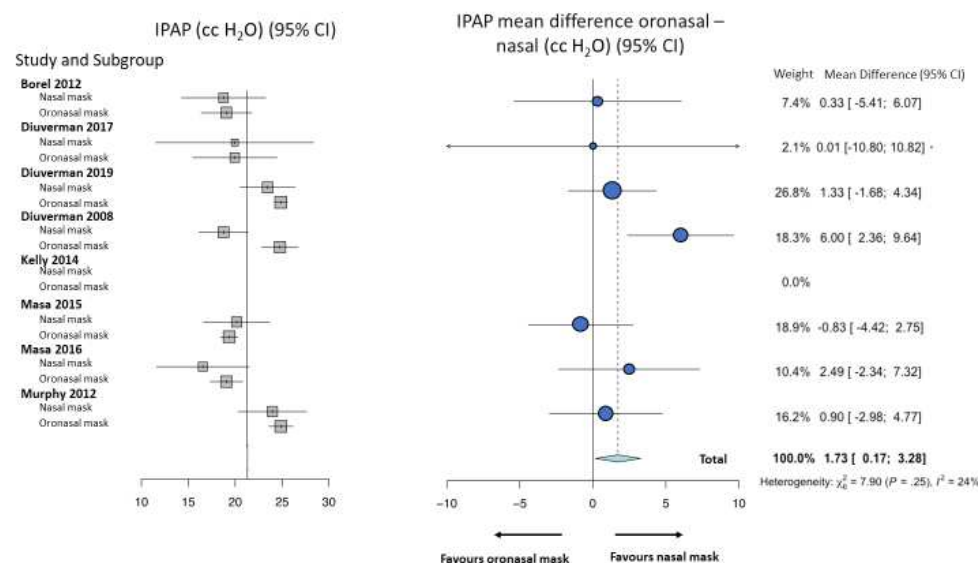

e-figure 3. Summary results of the two step meta-analysis using fixed effect model for Inspiratory Positive Airway Pressure (IPAP). The results for each type of mask in each study are displayed on the left forest plot and the interactions between the type of mask and the effect on the outcomes at the end of the studies are displayed on the right forest plot. Results are presented using mean differences and 95% CI. Squares are used to depict effects and circles to depict the interaction effects, with sizing in proportion to the inverse of the variance of the estimates.

## Interaction between mask-type and underlying pathology using marginal means

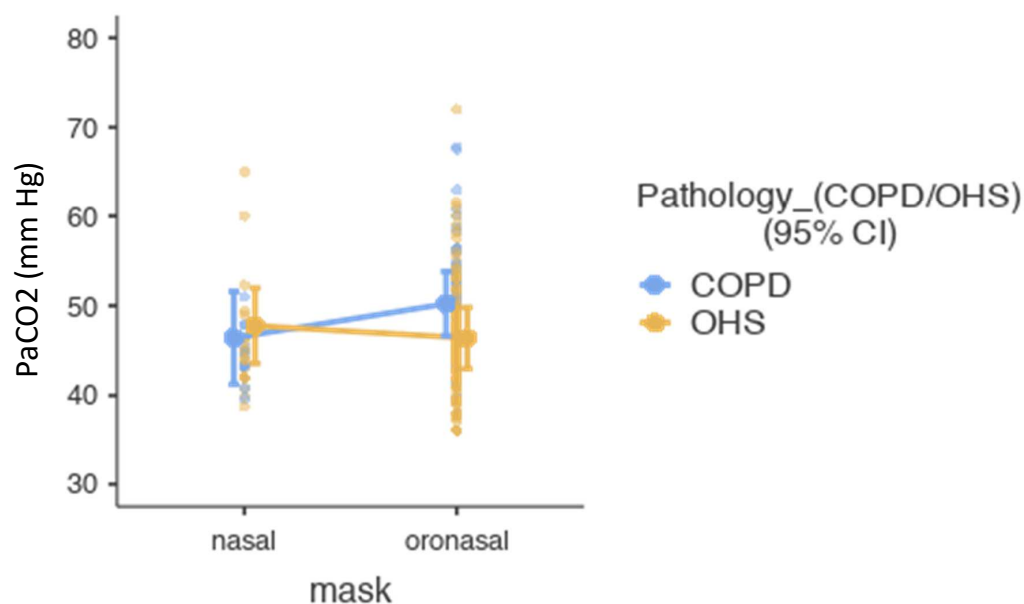

e-figure 4. Interaction between mask-type and underlying pathology for PaCO<sub>2</sub> using marginal means

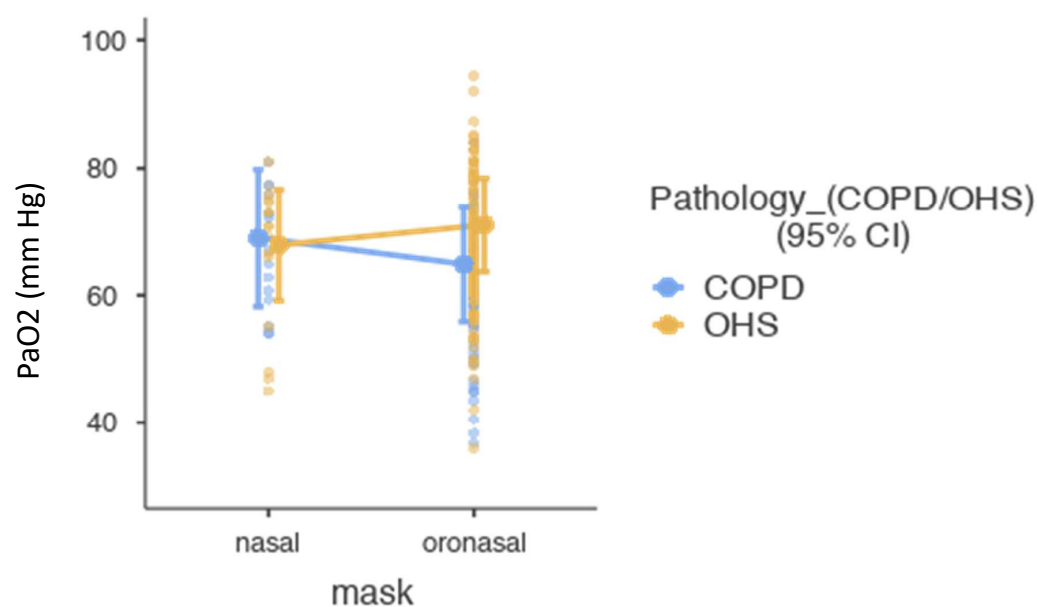

e-figure 5. Interaction between mask-type and underlying pathology for PaO<sub>2</sub> using marginal means

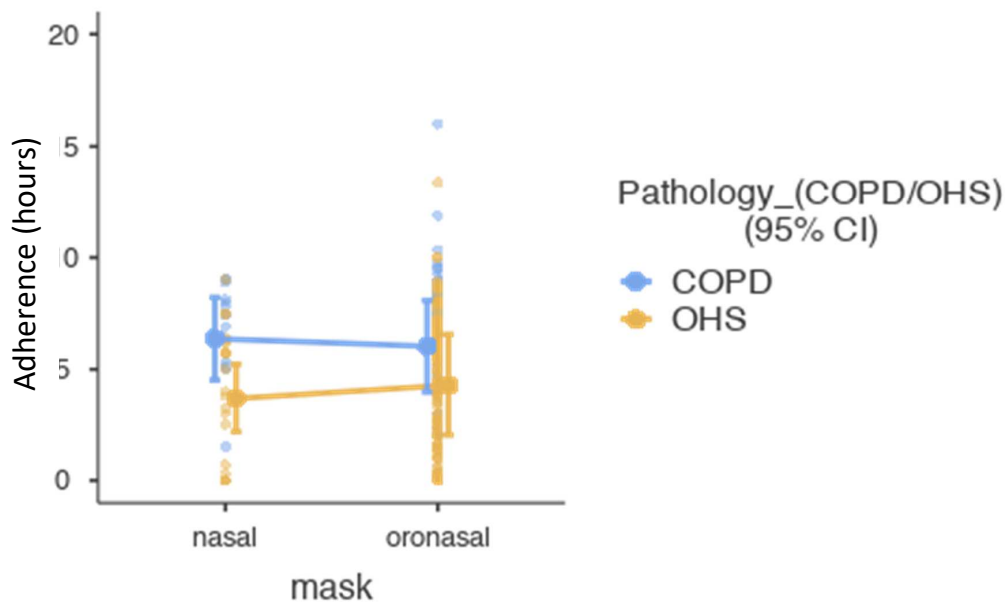

e-figure 6. Interaction between mask-type and underlying pathology for NIV adherence using marginal means

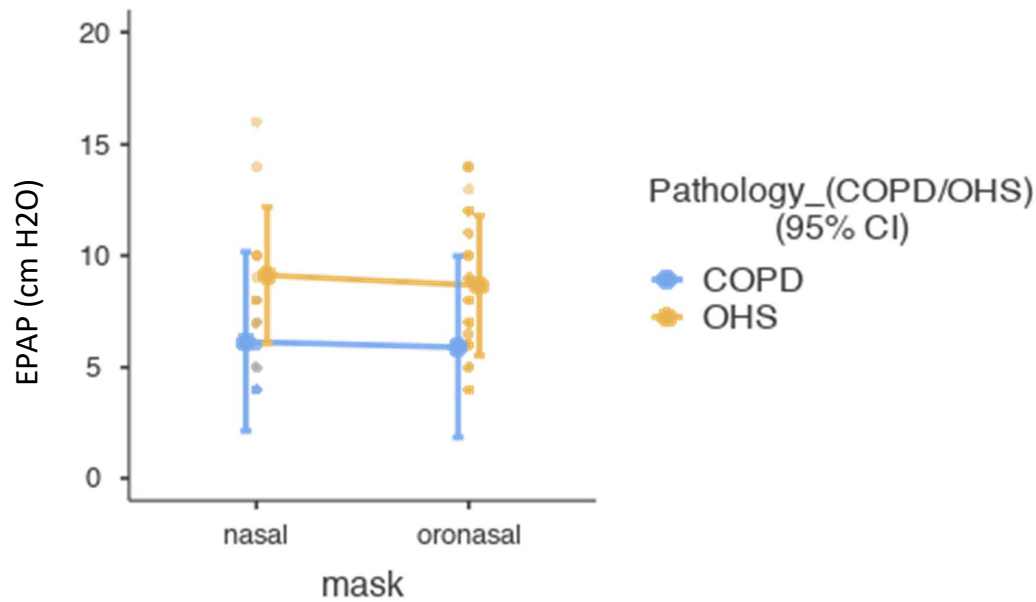

e-figure 7. Interaction between mask-type and underlying pathology for EPAP using marginal means

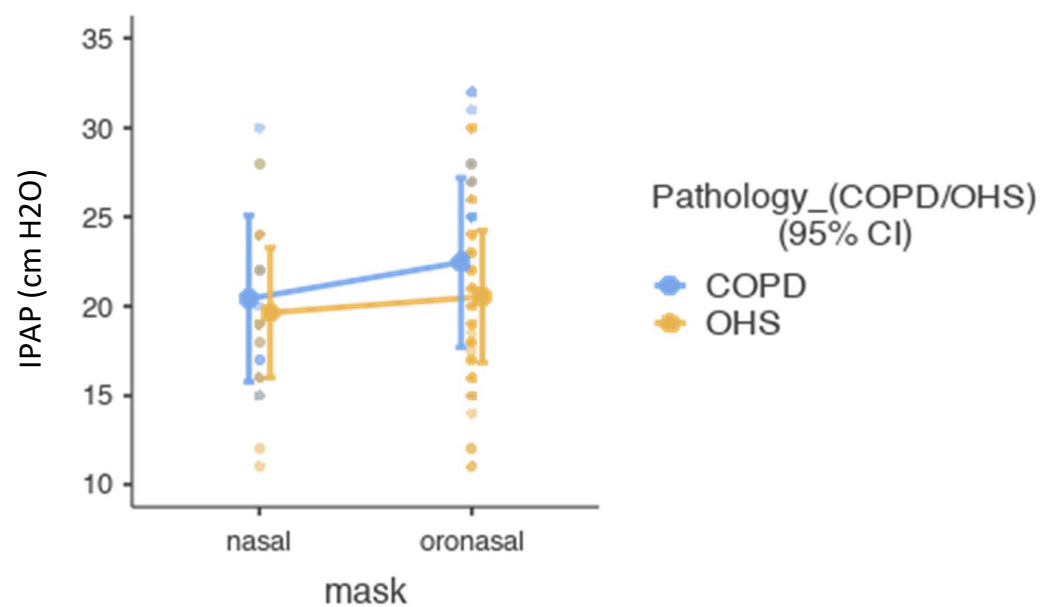

e-figure 8. Interaction between mask-type and underlying pathology for IPAP using marginal mean

## Non-inferiority analysis

### Methods

We defined non-inferiority margins for nasal versus oronasal masks for each outcome based on the studies included as well as discussion with the research team and reviewers ( $\Delta Y = Y_{\text{nasal}} - Y_{\text{facial}}$ ): 3 mmHg for PaCO<sub>2</sub><sup>1</sup>, -4mmHg for PaO<sub>2</sub><sup>2-5</sup>, -1 hour per day for compliance<sup>1</sup> and 2cmH<sub>2</sub>O for EPAP<sup>6</sup> and IPAP<sup>7</sup>. Nasal masks were thus deemed non-inferior to oronasal masks if the lower boundary of the mean difference was inferior to these thresholds.

### Results

For PaCO<sub>2</sub>, the overall result and the results of 2 individual studies showed that nasal masks were non-inferior to oronasal masks. The remaining studies were underpowered and the results were inconclusive (e-Figure 9A). The results for PaO<sub>2</sub> were more heterogeneous: 2 individual studies showed non-inferiority of nasal masks whilst another showed clear inferiority, and the results of the remaining 4 studies and the overall result were inconclusive (e-Figure 9B). With regards to compliance, no studies provided conclusive results (e-Figure 9C). For EPAP and IPAP (e-Figures 10A and 10B), the overall result and the results of 2 studies showed non-inferiority, and the remaining studies were inconclusive.

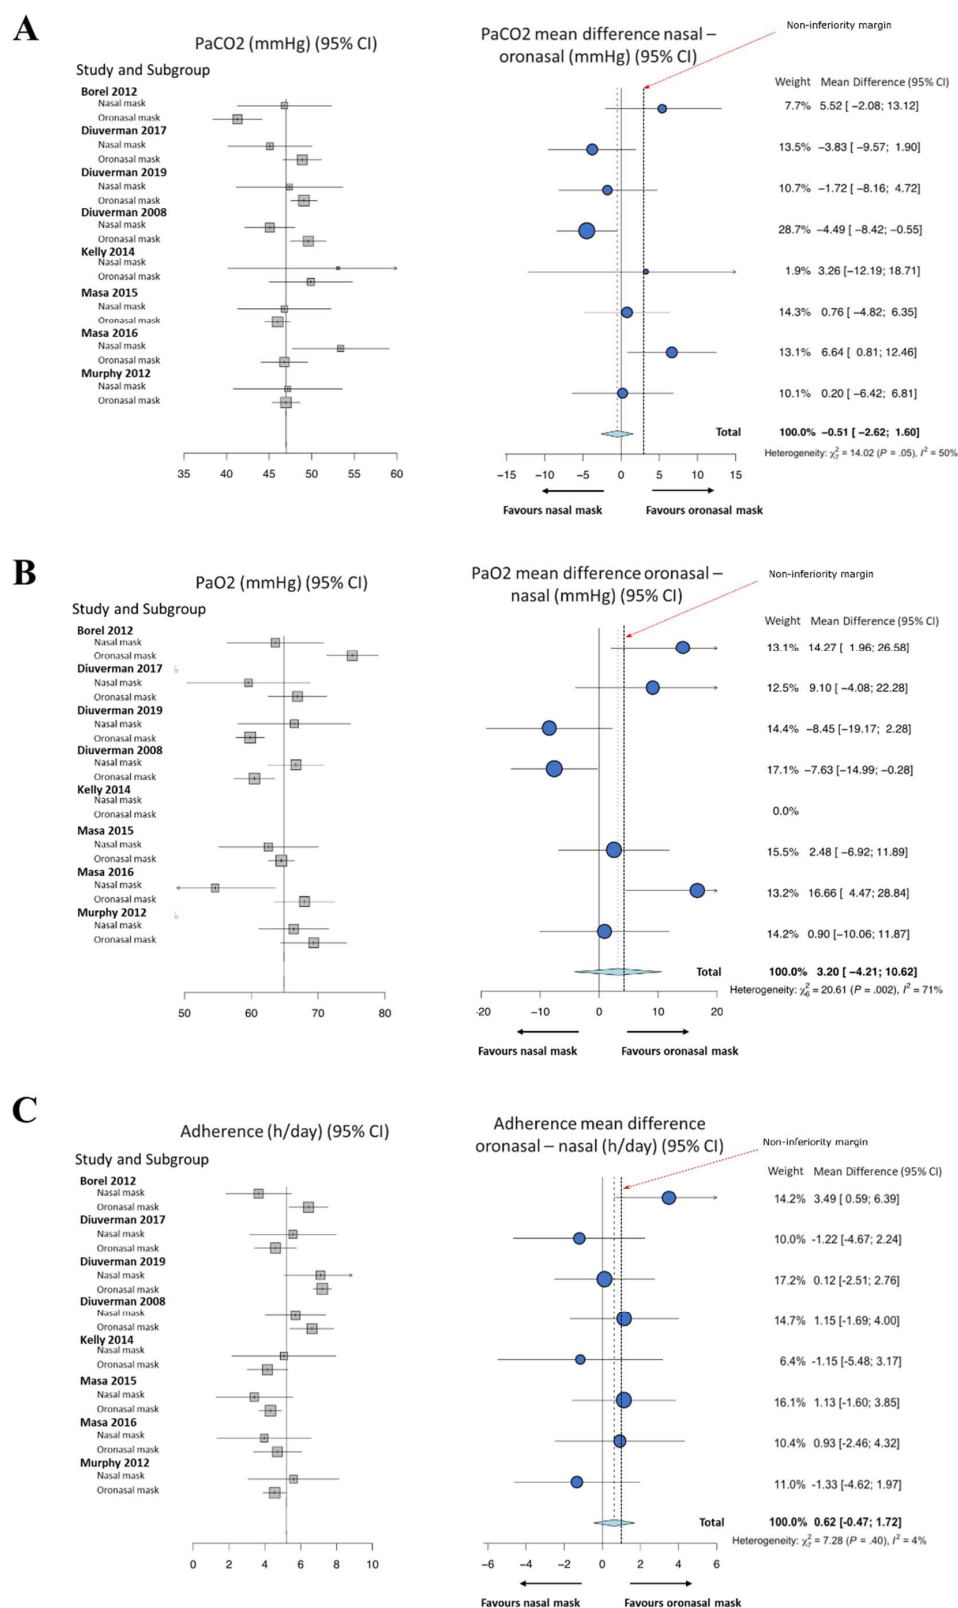



e-figure 9 A; B and C: Summary results of the two step meta-analysis for PaCO<sub>2</sub> (A), PaO<sub>2</sub> (B) and NIV adherence (C) with the non-inferiority margins. The results for each type of mask in each study are displayed on the left forest plot and the interaction between mask-type and the effect on the outcomes at the end of the studies are displayed on the right forest plot. Results are presented using mean differences and 95% CI. Squares are used to depict effects and circles to depict the interaction effects, with sizing in proportion to the inverse of the variance of the estimates.

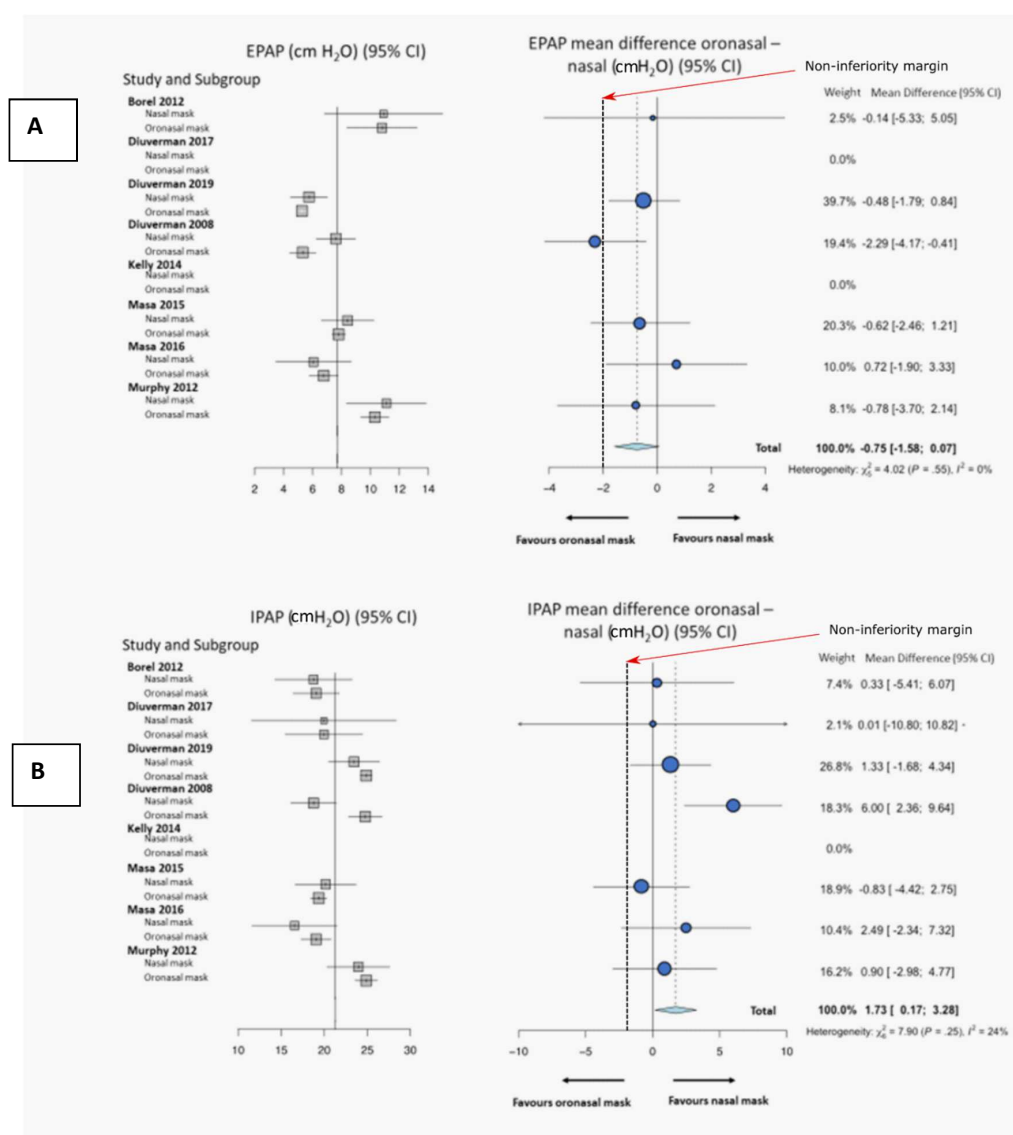

e-figure 10 A and B: Summary results of the two step meta-analysis for EPAP (A) and IPAP (B) with the non-inferiority margins. The results for each type of mask in each study are displayed on the left forest plot and the interaction between mask-type and the effect on the outcomes at the end of the studies are displayed on the right forest plot. Results are presented using mean differences and 95% CI. Squares are used to depict effects and circles to depict the interaction effects, with sizing in proportion to the inverse of the variance of the estimates

## Trial sequential analysis

As highlighted by a reviewer, the small number of patients with nasal masks compared to oronasal masks may have reduced the power of the analysis. However, both the CIs and the point estimates were centered on the null value, thus we believe that a greater power would have given similar results. Moreover, we calculated the optimal information size of our meta-analysis for the primary outcome (PaCO<sub>2</sub>). The optimal information size (OIS) is equivalent to a sample size calculation for a clinical trial but adjusted on the variance introduced by the heterogeneity across included trials (populations, interventions, methods etc.)<sup>8</sup>. This OIS was also used to grade the imprecision of the estimates according to GRADE guideline 6<sup>9</sup>. We thus calculated the OIS with an alpha type 1 error of 5%, a power of 80%, and the variance and the heterogeneity estimated from the meta-analysis in order to determine the minimally clinical difference that was then used to define non-inferiority margins. When the OIS was not reached we calculated O'brian and Flemming adjusted boundaries for statistical significance and futility.

### Results

The optimal sample size to highlight a mean difference in PaCO<sub>2</sub> of 3mmHg between the two mask types was 460. With the 266 patients included, the actual power of the analysis was 58%. However, the meta-analysis estimates crossed the adjusted futility boundaries suggesting that oronasal masks are unlikely to be superior to nasal masks based on a minimally clinical important difference of 3mmHg.”

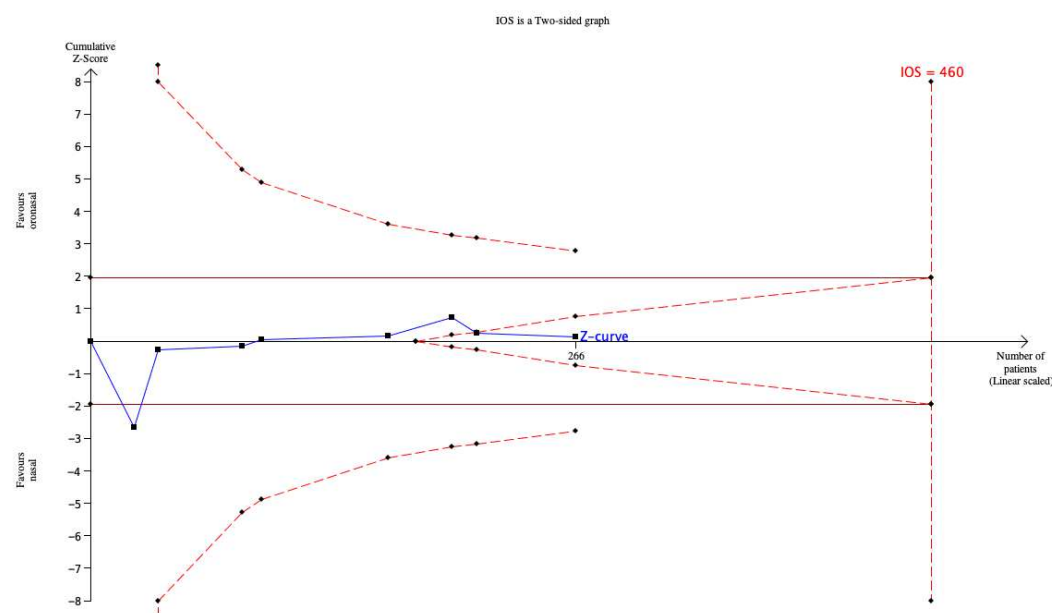

e-figure 11: Trial sequential analysis for PaCO<sub>2</sub>

## References

1. Duiverman, M. L. *et al.* Home initiation of chronic non-invasive ventilation in COPD patients with chronic hypercapnic respiratory failure: a randomised controlled trial. *Thorax* **75**, 244–252 (2020).
2. Borel, J.-C. *et al.* Noninvasive ventilation in mild obesity hypoventilation syndrome: a randomized controlled trial. *Chest* **141**, 692–702 (2012).
3. Murphy, P. B. *et al.* Volume targeted versus pressure support non-invasive ventilation in patients with super obesity and chronic respiratory failure: a randomised controlled trial. *Thorax* **67**, 727–734 (2012).
4. Duiverman, M. L. *et al.* Nocturnal non-invasive ventilation in addition to rehabilitation in hypercapnic patients with COPD. *Thorax* **63**, 1052–1057 (2008).
5. Masa, J. F. *et al.* Efficacy of Different Treatment Alternatives for Obesity Hypoventilation Syndrome. Pickwick Study. *Am. J. Respir. Crit. Care Med.* **192**, 86–95 (2015).
6. Patout, M. *et al.* Polysomnography versus limited respiratory monitoring and nurse-led titration to optimise non-invasive ventilation set-up: a pilot randomised clinical trial. *Thorax* **74**, 83–86 (2019).
7. Fernandez, R. *et al.* Nasal versus oronasal mask in home mechanical ventilation: the preference of patients as a strategy for choosing the interface. *Respir. Care* **57**, 1413–1417 (2012).
8. Wetterslev, J., Jakobsen, J. C. & Gluud, C. Trial Sequential Analysis in systematic reviews with meta-analysis. *BMC Med. Res. Methodol.* **17**, 39 (2017).
9. Guyatt, G. H. *et al.* GRADE guidelines 6. Rating the quality of evidence--imprecision. *J. Clin. Epidemiol.* **64**, 1283–1293 (2011).
